# Supplementary material for: Safety of 3’‐Sialyllactose (3’‐SL) sodium salt as a novel food pursuant to Regulation (EU) 2015/2283
Source: PubMed Central journal article supplement (PMC10464685; doi:10.2903/j.efsa.2020.6098), 2020-05-14
Supplement: EFS2-18-e06098-s001.pdf [file EFS2-18-e06098-s001.pdf]

## **Supporting information**

### **Safety of 3' -sialyllactose sodium salt (3'-SL) as a novel food pursuant to Regulation (EU) 2015/2283**

**EFSA-Q-2018-00204**

**Summary results of the 90-day repeated dose toxicity study in the rat with  
the NF**

Summary results of parameters with statistically significant differences in the 90-day repeated dose toxicity study in the rat with the NF (unpublished study report, 2019d)

| Parameters       | Exposure (day) | Sex        | Control     | Oligofructose control (5000 mg/kg bw) | 3'-SL sodium salt        |                          |                           |
|------------------|----------------|------------|-------------|---------------------------------------|--------------------------|--------------------------|---------------------------|
|                  |                |            |             |                                       | Low dose (1000 mg/kg bw) | Mid dose (3000 mg/kg bw) | High dose (5000 mg/kg bw) |
| Body weight (g)  | 57             | F          | 219 ± 15.2  | 223 ± 14.2                            | 234 ± 17.8 *             | 232 ± 6.1*               | 234 ± 20.2*               |
|                  | 60             | M          | 397 ± 20.8  | 370 ± 27.4 **                         | 381 ± 31.1               | 389 ± 21.7               | 375 ± 33.3*               |
|                  |                | F          | 227 ± 12.6  | 232 ± 12.9                            | 244 ± 15.4*              | 237 ± 7.6*               | 242 ± 21.6*               |
|                  | 64             | M          | 417 ± 22.0  | 387 ± 29.9**                          | 399 ± 31.7               | 411 ± 25.4               | 391 ± 36.3*               |
|                  |                | F          | 234 ± 14.1  | 238 ± 14.1                            | 250 ± 16.9*              | 246 ± 8.8*               | 250 ± 22.7**              |
|                  | 67             | M          | 433 ± 24.0  | 399 ± 30.7**                          | 414 ± 33.8               | 427 ± 26.2               | 404 ± 38.1*               |
|                  |                | F          | 242 ± 15.5  | 243 ± 13.9                            | 261 ± 16.3*              | 252 ± 7.1*               | 256 ± 22.0*               |
|                  | 71             | M          | 450 ± 25.9  | 415 ± 33.8**                          | 431 ± 36.1               | 443 ± 26.2               | 420 ± 42.3 *              |
|                  |                | F          | 249 ± 17.1  | 250 ± 13.0                            | 266 ± 17.2               | 256 ± 6.9                | 262 ± 22.7*               |
|                  | 74             | M          | 462 ± 28.4  | 423 ± 36.6**                          | 441 ± 38.2               | 455 ± 30.8               | 430 ± 41.9*               |
|                  |                | F          | 249 ± 13.8  | 253 ± 13.9                            | 267 ± 18.7*              | 260 ± 9.8*               | 265 ± 22.6*               |
|                  | 78             | M          | 475 ± 29.8  | 439 ± 37.8                            | 458 ± 39.7               | 470 ± 30.1               | 442 ± 44.8*               |
|                  |                | F          | 256 ± 12.6  | 258 ± 11.5                            | 273 ± 18.6               | 264 ± 9.5                | 270 ± 24.3*               |
|                  | 81             | M          | 487 ± 27.6  | 446 ± 39.1**                          | 470 ± 42.3               | 478 ± 30.8               | 449 ± 45.6*               |
|                  | 85             | M          | 491 ± 28.3  | 452 ± 41.0 **                         | 478 ± 41.9               | 487 ± 32.9               | 455 ± 45.6*               |
|                  |                | F          | 260 ± 17.6  | 265 ± 12.4                            | 280 ± 23.8               | 273 ± 11.9*              | 276 ± 24.9*               |
|                  | 88             | M          | 498 ± 29.6  | 460 ± 42**                            | 479 ± 43.4               | 490 ± 32.8               | 462 ± 46.8*               |
|                  |                | F          | 263 ± 17.4  | 265 ± 13.9                            | 277 ± 22.5               | 272 ± 11.6               | 278 ± 22.7*               |
| 91               | M              | 502 ± 30.0 | 464 ± 40.2* | 481 ± 44.6                            | 496 ± 31.2               | 467 ± 48.4*              |                           |
|                  | F              | 265 ± 14.8 | 267 ± 12.6  | 282 ± 21.2                            | 272 ± 10.6               | 280 ± 23.6*              |                           |
| Ulna length (mm) | 8              | M          | 19.7 ± 0.69 | 18.6 ± 0.40**                         | 18.9 ± 0.36**            | 19.4 ± 0.33              | 19.2 ± 0.35*              |
|                  |                | F          | 19.1 ± 0.52 | 18.3 ± 0.48**                         | 19 ± 0.36                | 19.2 ± 0.41              | 18.7 ± 0.37*              |
|                  | 22             | F          | 25.7 ± 0.39 | 25.4 ± 0.38                           | 26.2 ± 0.34**            | 26.2 ± 0.35**            | 25.4 ± 0.44               |
|                  | 50             | M          | 35.6 ± 0.71 | 34.0 ± 0.79**                         | 35.2 ± 0.68              | 34.7 ± 0.89**            | 34.6 ± 0.60**             |

|                                      |            |   |             |               |               |               |                |
|--------------------------------------|------------|---|-------------|---------------|---------------|---------------|----------------|
|                                      |            | F | 32.7 ± 0.53 | 32.7 ± 0.56   | 33.4 ± 0.20*  | 33.1 ± 0.81   | 32.7 ± 0.54**  |
|                                      | 64         | M | 38 ± 0.76   | 37.4 ± 0.70*  | 37.7 ± 0.69   | 37.6 ± 0.72   | 37.0 ± 0.67**  |
|                                      | 78         | F | 35.2 ± 0.54 | 35.7 ± 0.56** | 36.0 ± 0.44*  | 35.9 ± 0.47*  | 35.5 ± 0.73**  |
| <b>Haematology</b>                   |            |   |             |               |               |               |                |
| Haemoglobin (g/dL)                   | 90         | M | 15.7 ± 0.40 | 15.1 ± 0.50*  | 15.1 ± 0.26*  | 15.7 ± 0.44   | 14.5 ± 0.551 * |
|                                      |            | F | 15.0 ± 0.31 | 14.4 ± 0.56** | 14.5 ± 0.63   | 15.1 ± 0.48   | 14.4 ± 0.35**  |
| Erythrocytes (x10 <sup>12</sup> /L)  | 90         | F | 7.54 ± 0.33 | 7.03 ± 0.45*  | 7.09 ± 0.72   | 7.37 ± 0.54   | 6.99 ± 0.54*   |
| Neutrophils (X10 <sup>9</sup> /L)    | 90         | F | 0.08 ± 0.02 | 0.09 ± 0.04   | 0.10 ± 0.04 * | 0.07 ± 0.03   | 0.12 ± 0.05 *  |
| PT (sec)                             | 90         | M | 25.0 ± 2.42 | 23.0 ± 1.63*  | 20.8 ± 2.40** | 22.2 ± 2.04** | 21.5 ± 2.18**  |
|                                      |            | F | 27.4 ± 2.27 | 22.7 ± 2.41** | 24.0 ± 2.19*  | 25.3 ± 3.04*  | 22.0 ± 1.60*   |
| <b>Clinical chemistry parameters</b> |            |   |             |               |               |               |                |
| ALP (U/L)                            | week 4 rec | F | 41 ± 7.2    | 72 ± 60.7     | --            | --            | 103 ± 36.2**   |
| ALT (U/L)                            | week 4 rec | F | 25 ± 3.4    | 24 ± 2.8      | --            | --            | 43 ± 12.2**    |
| Glucose (mmol/L)                     | week 4 rec | F | 8.9 ± 0.97  | 8.1 ± 0.97    | --            | --            | 7.1 ± 0.63**   |
| Urea (mmol/L)                        | 90         | M | 5.70 ± 0.59 | 4.75 ± 0.76** | 5.19 ± 0.68   | 6.20 ± 0.92*  | 6.77 ± 1.08**  |
|                                      | 90         | F | 5.70 ± 0.65 | 5.98 ± 1.16   | 5.94 ± 0.74   | 6.56 ± 0.71   | 7.37 ± 1.34**  |
| Creatinine (µmol/L)                  | 90         | M | 21 ± 2.3    | 22 ± 2.3      | 22 ± 1.6      | 23 ± 3.3*     | 23 ± 3.1*      |
| Triglycerides (mmol/L)               | 90         | M | 0.41 ± 0.15 | 0.71 ± 0.10   | 0.42 ± 0.12   | 0.44 ± 0.23   | 0.61 ± 0.17*   |
|                                      | 90         | F | 0.32 ± 0.08 | 0.30 ± 0.05   | 0.36 ± 0.12   | 0.34 ± 0.11   | 0.48 ± 0.20*   |
| Sodium (mmol/L)                      | 90         | M | 143 ± 1.2   | 141 ± 1.3**   | 142 ± 1.3*    | 140 ± 1.3**   | 140 ± 2.0**    |
|                                      | 90         | F | 140 ± 1.0   | 140 ± 1.8     | 141 ± 1.3     | 140 ± 1.2     | 139 ± 1.6*     |
| Potassium (mmol/L)                   | week 4 rec | M | 5.1 ± 0.09  | 4.8 ± 0.31    | --            | --            | 4.5 ± 0.59*    |
|                                      | week 4 rec | F | 4.4 ± 0.11  | 4.5 ± 0.21    | --            | --            | 5.0 ± 0.34**   |
| Chloride (mmol/L)                    | 90         | M | 101 ± 1.0   | 99 ± 1.5**    | 100 ± 0.9     | 98 ± 1.7**    | 94 ± 1.3**     |
|                                      | 90         | F | 100 ± 1.4   | 99 ± 1.7      | 101 ± 1.1     | 99 ± 1.4      | 97 ± 2.0**     |
| Inorganic phosphorus (mmol/L)        | week 4 rec | M | 1.73 ± 0.09 | 1.83 ± 0.09   | --            | --            | 1.29 ± 0.28**  |
|                                      | week 4 rec | F | 1.29 ± 0.22 | 1.37 ± 0.12   | --            | --            | 1.79 ± 0.20**  |
| Total protein (g/L)                  | 90         | M | 64 ± 3.8    | 61 ± 2.9**    | 63 ± 2.2      | 64 ± 2.9      | 60 ± 1.6**     |
| Albumin (g/L)                        | week 4 rec | M | 35 ± 1.2    | 35 ± 0.9      | --            | --            | 33 ± 0.8*      |
|                                      | week 4 rec | F | 39 ± 2.2    | 38 ± 1.8      | --            | --            | 36 ± 1.7*      |
| A/G (Ratio)                          | week 4 rec | M | 1.16 ± 0.08 | 1.20 ± 0.09   | --            | --            | 1.35 ± 0.06**  |

|                                            | week 4 rec | F | 1.32 ± 0.08  | 1.28 ± 0.07   | --            | --            | 1.22 ± 0.05*    |
|--------------------------------------------|------------|---|--------------|---------------|---------------|---------------|-----------------|
| <b>Urinalysis</b>                          |            |   |              |               |               |               |                 |
| Volume (mL)                                | 90         | M | 6.6 ± 1.57   | 7.0 ± 2.81    | 8.0 ± 3.31    | 8.3 ± 3.55    | 3.8 ± 1.06**    |
| pH                                         | 90         | M | 7.0 ± 0.33   | 6.9 ± 0.55    | 7.6 ± 0.28**  | 8.0 ± 0.31**  | 8.0 ± 0.57**    |
|                                            | 90         | F | 6.6 ± 0.29   | 7.0 ± 1.16    | 7.1 ± 0.36*   | 7.5 ± 0.31**  | 7.7 ± 0.37**    |
| Specific gravity (g/L)                     | 90         | M | 1036 ± 4.5   | 1032 ± 12.2   | 1030 ± 4.0    | 1036 ± 10.2   | 1051 ± 7.9 *    |
| Total proteins (mg)                        | 90         | M | 6.88 ± 1.322 | 5.48 ± 1.58   | 6.87 ± 2.62   | 6.06 ± 1.90   | 2.98 ± 0.99**   |
| Total creatinin (µmol)                     | 90         | M | 72.04 ± 8.14 | 66.50 ± 10.64 | 72.47 ± 25.09 | 73.13 ± 12.40 | 51.70 ± 15.04** |
| <b>Organ weight (adjusted mean values)</b> |            |   |              |               |               |               |                 |
| Kidneys (g)                                | 90         | F | 1.85         | 1.82          | 2.00*         | 1.95*         | 1.93*           |
| Brain (g)                                  | 90         | M | 2.34         | 2.24**        | 2.29          | 2.32          | 2.26**          |
| Salivary glands (g)                        | 90         | M | 0.77         | 0.73          | 0.73          | 0.71          | 0.68**          |
| Testes (g)                                 | 90         | M | 3.51         | 3.60          | 3.35          | 3.57          | 3.73*           |
| Prostate (g)                               | 90         | M | 1.03         | 1.06          | 1.01          | 0.88          | 1.20*           |

Doses expressed in mg/kg bw/day of 3'-SL sodium salt; results expressed as mean ± standard deviation

MCH = mean cell haemoglobin; MCHC = mean cell haemoglobin concentration; MCV = mean cell volume; RDW = red cell distribution width; LUC = large unstained cells; ALT = alanine aminotransferase; AST = aspartate aminotransferase; A/G = albumin/globulin ratio

\* Significantly different from control (p<0.05) (Control vs 3'-SL-treated groups or reference control); \*\* Significantly different from control (p<0.01) (Control vs 3'-SL-treated groups or reference control)
